# Supplementary material
Source: ML conference proceedings conference paper supplement (https://proceedings.neurips.cc/paper_files/paper/2019/hash/57c0531e13f40b91b3b0f1a30b529a1d-Abstract.html)
Supplement: Supplementary file [file 57c0531e13f40b91b3b0f1a30b529a1d-Supplemental.zip]

---

# Meta-Curvature: Supplementary Materials

---

Anonymous Author(s)

Affiliation

Address

email

## 1 Meta-training algorithm

Alg. 1 shows the details of the algorithm to train meta-curvature matrices and the initial model parameters. To avoid cluttered notation, we assumed the model has only one layer and it is straightforward to extend to multiple layers.

## 2 Case study

In this section, we provide a case study of the linear regression example. Let  $\mathbf{X}_{\text{tr}}, \mathbf{X}_{\text{val}}, \mathbf{X}_{\text{new}} \in \mathbb{R}^{m \times p}$  training, validation, and test set and their targets are  $\mathbf{Y}_{\text{tr}}, \mathbf{Y}_{\text{val}}, \mathbf{Y}_{\text{new}} \in \mathbb{R}^m$ . With the model's parameter  $\theta \in \mathbb{R}^p$ , a typical loss function for the linear regression is defined as follows.

$$J(\theta) = \frac{1}{2} \|\mathbf{Y} - \mathbf{X}\theta\|^2. \quad (1)$$

The gradient w.r.t the model's parameter  $\theta$  is

$$\nabla_{\theta} J(\theta) = -\mathbf{X}^{\top} (\mathbf{Y} - \mathbf{X}\theta). \quad (2)$$

Given the meta-curvature matrix,  $\mathbf{M}$ , a fixed inner learning rate  $\alpha$ , then the meta-objective function is

$$J_{\text{val}}(\theta) = \frac{1}{2} \|\mathbf{Y}_{\text{val}} - \mathbf{X}_{\text{val}}(\theta^{\text{tr}})\|^2 \quad (3)$$

Following the derivation from the main text and given the new test set, we perform one inner and outer optimization steps. And the transformed gradient for the new test set is as follow.

$$\mathbf{M}_{\text{new}} \nabla_{\theta} J_{\text{new}}(\theta) \quad (4)$$

$$= \mathbf{M} \nabla_{\theta} J_{\text{new}}(\theta) + \beta (\nabla_{\theta} J_{\text{tr}}(\theta)^{\top} \nabla_{\theta} J_{\text{new}}(\theta)) \alpha \nabla_{\theta} J_{\text{val}}(\theta^{\text{tr}}) \quad (5)$$

$$= \mathbf{M} \nabla_{\theta} J_{\text{new}}(\theta) - \beta [(\mathbf{Y}_{\text{tr}} - \mathbf{X}_{\text{tr}}\theta)^{\top} \mathbf{X}_{\text{tr}} \mathbf{X}_{\text{new}}^{\top} (\mathbf{Y}_{\text{new}} - \mathbf{X}_{\text{new}}\theta)] \alpha \nabla_{\theta} J_{\text{val}}(\theta^{\text{tr}}) \quad (6)$$

$$= \mathbf{M} \nabla_{\theta} J_{\text{new}}(\theta) - \beta [(\mathbf{Y}_{\text{tr}} - \mathbf{X}_{\text{tr}}\theta)^{\top} \mathbf{X}_{\text{tr}} \mathbf{X}_{\text{new}}^{\top} (\mathbf{Y}_{\text{new}} - \mathbf{X}_{\text{new}}\theta)] \alpha [\mathbf{X}_{\text{val}}^{\top} (\mathbf{Y}_{\text{val}} - \mathbf{X}_{\text{val}}\theta^{\text{tr}})] \quad (7)$$

$$= \mathbf{M} \nabla_{\theta} J_{\text{new}}(\theta) - \beta [(\mathbf{Y}_{\text{tr}} - \mathbf{X}_{\text{tr}}\theta)^{\top} \mathbf{X}_{\text{tr}} \mathbf{X}_{\text{new}}^{\top} (\mathbf{Y}_{\text{new}} - \mathbf{X}_{\text{new}}\theta)] \alpha [\mathbf{X}_{\text{val}}^{\top} \mathbf{Y}_{\text{val}} - \mathbf{X}_{\text{val}}^{\top} \mathbf{X}_{\text{val}} (\theta - \alpha \mathbf{M} \mathbf{X}_{\text{tr}}^{\top} (\mathbf{Y}_{\text{tr}} - \mathbf{X}_{\text{tr}}\theta))] \quad (8)$$

$$= \mathbf{M} \nabla_{\theta} J_{\text{new}}(\theta) - \beta \underbrace{[(\mathbf{Y}_{\text{tr}} - \mathbf{X}_{\text{tr}}\theta)^{\top} \mathbf{X}_{\text{tr}} \mathbf{X}_{\text{new}}^{\top} (\mathbf{Y}_{\text{new}} - \mathbf{X}_{\text{new}}\theta)]}_{\mathbf{A}} \underbrace{[\alpha \mathbf{X}_{\text{val}}^{\top} (\mathbf{Y}_{\text{val}} - \mathbf{X}_{\text{val}}\theta) - \alpha^2 \mathbf{X}_{\text{val}}^{\top} \mathbf{X}_{\text{val}} \mathbf{M} \mathbf{X}_{\text{tr}}^{\top} (\mathbf{Y}_{\text{tr}} - \mathbf{X}_{\text{tr}}\theta)]}_{\mathbf{B} \quad \mathbf{C} \quad \mathbf{D}}. \quad (9)$$

The term  $\mathbf{A}$  is the gradient similarity term, and in linear regression case, it is defined as a bilinear form e.g.  $\mathbf{x}^{\top} \mathbf{A} \mathbf{y}$ , where  $\mathbf{A} = \mathbf{X}_{\text{tr}} \mathbf{X}_{\text{new}}^{\top}$ . It is multiplied by both training and test residuals.  $\mathbf{A}$  is related to

---

**Algorithm 1** Training MAML with the meta-curvature for few-shot supervised learning

---

**Input:** task distribution  $p(\mathcal{T})$ , learning rate  $\alpha, \beta$   
Initialize  $\mathbf{M}_o, \mathbf{M}_i, \mathbf{M}_f = \mathbf{I}$   
**while** not converged **do**  
  Sample batch of tasks  $\tau_i \sim p(\mathcal{T})$   
  **for all**  $\tau_i$  **do**  
     $\theta^{\tau_i} = \theta - \alpha \mathbf{M}_{mc} \nabla \mathcal{L}_{tr}^{\tau_i}(\theta)$  {Assuming one gradient step}  
  **end for**  
   $\theta \leftarrow \text{ADAM}(\theta, \beta, \nabla_{\theta} \sum_{\tau_i} \mathcal{L}_{val}^{\tau_i}(\theta^{\tau_i}))$   
   $\mathbf{M}_o \leftarrow \text{ADAM}(\mathbf{M}_o, \beta, \nabla_{\mathbf{M}_o} \sum_{\tau_i} \mathcal{L}_{val}^{\tau_i}(\theta^{\tau_i}))$   
   $\mathbf{M}_i \leftarrow \text{ADAM}(\mathbf{M}_i, \beta, \nabla_{\mathbf{M}_i} \sum_{\tau_i} \mathcal{L}_{val}^{\tau_i}(\theta^{\tau_i}))$   
   $\mathbf{M}_f \leftarrow \text{ADAM}(\mathbf{M}_f, \beta, \nabla_{\mathbf{M}_f} \sum_{\tau_i} \mathcal{L}_{val}^{\tau_i}(\theta^{\tau_i}))$   
**end while**

---

Table 1: Few-shot regression results on sinusoidal functions.

| Method   | 5-shot                              | 10-shot                             | 20-shot                             |
|----------|-------------------------------------|-------------------------------------|-------------------------------------|
| MAML     | $0.686 \pm 0.070$                   | $0.435 \pm 0.039$                   | $0.228 \pm 0.024$                   |
| Meta-SGD | $0.482 \pm 0.061$                   | $0.258 \pm 0.026$                   | $0.127 \pm 0.013$                   |
| LayerLR  | $0.528 \pm 0.068$                   | $0.269 \pm 0.027$                   | $0.134 \pm 0.014$                   |
| MC1      | $0.426 \pm 0.054$                   | $0.239 \pm 0.025$                   | $0.125 \pm 0.013$                   |
| MC2      | <b><math>0.405 \pm 0.048</math></b> | <b><math>0.201 \pm 0.020</math></b> | <b><math>0.112 \pm 0.011</math></b> |

15 covariance matrix, but between training set and the new test set. The term B is the validation gradient  
16 term. The terms C and D correspond to  $\mathcal{O}(\alpha^2)$ . Since the loss function of the linear regression has a  
17 quadratic form and its derivative has a linear form. Therefore, the Taylor expansion of the derivative  
18 has up to  $\alpha^2$  order. The term D is the transformed gradient and the term C is a covariance matrix of  
19 validation dataset (assuming it’s centered).

### 20 3 Few-shot regression

21 **Experimental setup** We used the same experimental setups in [1]. During training and testing, the  
22 amplitude and the phase vary within  $[0.1, 5.0]$  and  $[0, \pi]$  respectively, and data points are sampled  
23 from uniform distribution  $[-5, 5]$ . We used one gradient step with the fixed learning rate 0.01 and  
24 Adam was used for meta-training with the outer loop learning rate 0.001. We used the same network  
25 architecture, which has two 40 dimension fully connected layers with ReLU activation. We sampled  
26 25 tasks for every iterations and trained 70000 iterations. We reported the performance from the  
27 trained model that had the minimum loss value. [1] reported the MSE for 5-shot setting, and we could  
28 reproduced the results. [2] has slightly different settings, so the MSE are not directly comparable to  
29 theirs.

30 **Qualitative results:** We provide qualitative results of few-shot regression task on sinusoidal functions  
31 in Figure 1. The star shape markers are the few data points for training, and we draw the curves based  
32 on each methods, MAML, Meta-SGD, and the proposed MC2. The left column is 5-shot and the  
33 right column is 10-shot experiments.

### 34 4 Few-shot classification on Omniglot dataset

35 We used the same experimental setups in [1]. Out of 1623 characters, we used 1100 characters for  
36 training, 100 characters for validation, and remaining 423 characters for testing. The network archi-  
37 tecture is 4 convolutional layers with 64 filters and 1 fully connected layer for the final classification.  
38 We only used one inner gradient step with 0.4 learning rate for all meta-curvature experiments for  
39 training and testing. The batch size was set to 32 (5-way) and 16 (20-way), and outer loop learning  
40 rate is 0.001 and we trained 60000 iterations.

## 41 5 Few-shot classification on miniImagenet and tieredImageNet dataset

### 42 5.1 baseline CNNs

43 For both 5-way 1-shot and 5-way 5-shot classification, we set the batch size 4 for 1 step experiments  
44 and 2 for 5 step experiments. 15 examples per class were used for evaluating the model after updates.  
45 In total, we ran 100,000 iterations for 1 step experiments and 200,000 iterations for 2 step experiments.  
46 The inner/outer learning rates are  $\beta = 0.001$ ,  $\alpha = 0.01$ . We apply dropout rate 0.2 in the final linear  
47 layer for only MC1 and MC2 (other methods did perform worse with dropout). For cutout data  
48 augmentation, we cut out  $36 \times 36$  random crops.

### 49 5.2 WRN-28-10 features and MLP

50 We used the WRN-28-10 features provided by [4]. Although they also provide multi-view features  
51 (average of center and corner crops), we used a feature from the image center. The dimension of  
52 feature was 640 and we used one hidden layer (2048 units, ReLU activation function) followed  
53 by a softmax classifier. We used one gradient step for 1-shot experiments and 5 steps for 5-shot  
54 experiments. For 5-shot experiments, we used separate meta-curvature matrices for each iterations.  
55 Every training iterations, we sample random 16 tasks, and set the initial learning rate 0.005 and  
56 decay the learning rate down to 0.0001 by using a cosine annealing schedule. And we trained 30000  
57 iterations and used early stopping scheme to report the final performance.

## 58 6 Few-shot reinforcement learning

59 The goal of few-shot learning in reinforcement learning (RL) is that an agent can quickly adapt to a  
60 new task with little prior experience. A distinct feature from the few-shot supervised learning task is  
61 that the RL objective is not generally differentiable. Therefore, we use policy gradient methods to  
62 estimate the gradient both for inner and outer loop gradients. In addition, policy gradient methods  
63 are generally on-policy, which means that the training data depends on the agent’s initial policy.  
64 Therefore, the initial policy (with the meta-learned initial parameters) needs to explore as diverse  
65 experiences as possible to get proper feedback from a new task. We described the method and  
66 interpretation with respect to supervised classification tasks, but it can be easily modified to RL  
67 setting.

### 68 6.1 Experimental setup

69 We tested our method on complex high-dimensional locomotion tasks with the MuJoCo simulator  
70 [7]. Most of the settings are based on [1] for fair comparison. We consider two simulated robots  
71 (HalfCheetah and Walker2d) and two types of task environments (to run in a forward/backward  
72 direction or a particular velocity). The network architecture is two hidden layers of size 100 with  
73 ReLU activations for both. We used the standard linear feature baseline estimator. We evaluated  
74 the performance after one policy gradient step with 20 trajectories. We compare against MAML-  
75 TRPO and MAML-PPO. In the original MAML, TRPO [5] was used as the outer loop optimizer  
76 but we found out that using PPO [6] consistently outperformed the TRPO. MAML-PPO is also  
77 computationally more efficient since MAML-TRPO requires third-order gradients (or computed by  
78 hessian-vector product instead). To the best of our knowledge, MAML-PPO has not been tested on  
79 this setup. We evaluated two variations of meta-curvature similar to the classification setup, MC1 and  
80 MC2, and used PPO as the meta-optimizer. Note that this is a preliminary result, so this is not by  
81 no means conclusive. We provide this information for the readers who might be interested in this  
82 direction.

### 83 6.2 Experimental results

84 Fig. 2 shows the rewards obtained after one step policy gradient update. In the HalfCheetahDir  
85 experiment, our methods outperformed both strong baselines. MC1-PPO reached the same perfor-  
86 mance of a strong baseline, MAML-PPO three times faster. In HalfCheetahVel and Walker2dDir  
87 experiments, both MC2-PPO and MAML-PPO reached nearly the same performance, but in a more  
88 sample efficient manner. For Walker2dVel, MAML-TRPO showed the fastest convergence at the

earlier meta-training stage, but our meta-curvatures outperformed eventually. In this setting, most of the rewards come from the survival reward (the agent gets 1.0 reward for every step if they do not fall over). All methods were able to survive throughout the episode, but our methods run better at a given velocity. One thing we noticed that it stops obtaining more rewards and starts to degrade the performance in Walker2dDir experiment. The recently proposed approach [3] may alleviate this issue through better credit assignment in the meta-gradients. Combining it would be interesting direction to be explored.

## 7 Visualization

Fig. 3 is a visualization of meta-trained meta-curvature matrices for 5-way 1-shot classification task. To visualize the full matrix,  $\mathbf{M}_{mc}$ , we picked up the matrices from the first convolutional layer in the small model (filter size 64). Therefore with the 3 color input channels,  $\mathbf{M}_f \in \mathbb{R}^{9 \times 9}$ ,  $\mathbf{M}_i \in \mathbb{R}^{3 \times 3}$ ,  $\mathbf{M}_o \in \mathbb{R}^{64 \times 64}$ , and  $\mathbf{M}_{mc} \in \mathbb{R}^{1728 \times 1728}$ . The diagonal elements are high values, mostly  $> 0.5$ . Interestingly, there are also a lot of off-diagonal elements  $> 0.5$  or  $< -0.5$ . Thus, they capture the dependencies between the gradients.

## References

- [1] Chelsea Finn, Pieter Abbeel, and Sergey Levine. Model-Agnostic Meta-Learning for Fast Adaptation of Deep Networks. In *International Conference on Machine Learning (ICML)*, 2017.
- [2] Zhenguo Li, Fengwei Zhou, Fei Chen, and Hang Li. Meta-SGD: Learning to Learn Quickly for Few Shot Learning. *arXiv:1707.09835*, 2017.
- [3] Jonas Rothfuss, Dennis Lee, Ignasi Clavera, Tamim Asfour, and Pieter Abbeel. Promp: Proximal meta-policy search. In *International Conference on Learning Representations (ICLR)*, 2019.
- [4] Andrei A. Rusu, Dushyant Rao, Jakub Sygnowski, Oriol Vinyals, Razvan Pascanu, Simon Osindero, and Raia Hadsell. Meta-Learning with Latent Embedding Optimization. In *International Conference on Learning Representations (ICLR)*, 2019.
- [5] John Schulman, Sergey Levine, Philipp Moritz, and Pieter Abbeel Michael I. Jordan. Trust region policy optimization. In *International Conference on Machine Learning (ICML)*, 2015.
- [6] John Schulman, Filip Wolski, Prafulla Dhariwal, Alec Radford, and Oleg Klimov. Proximal Policy Optimization Algorithms. *arXiv:1707.06347*, 2017.
- [7] Emanuel Todorov, Tom Erez, and Yuval Tassa. Mujoco: A physics engine for model-based control. In *International Conference on Intelligent Robots and Systems (IROS)*, 2012.

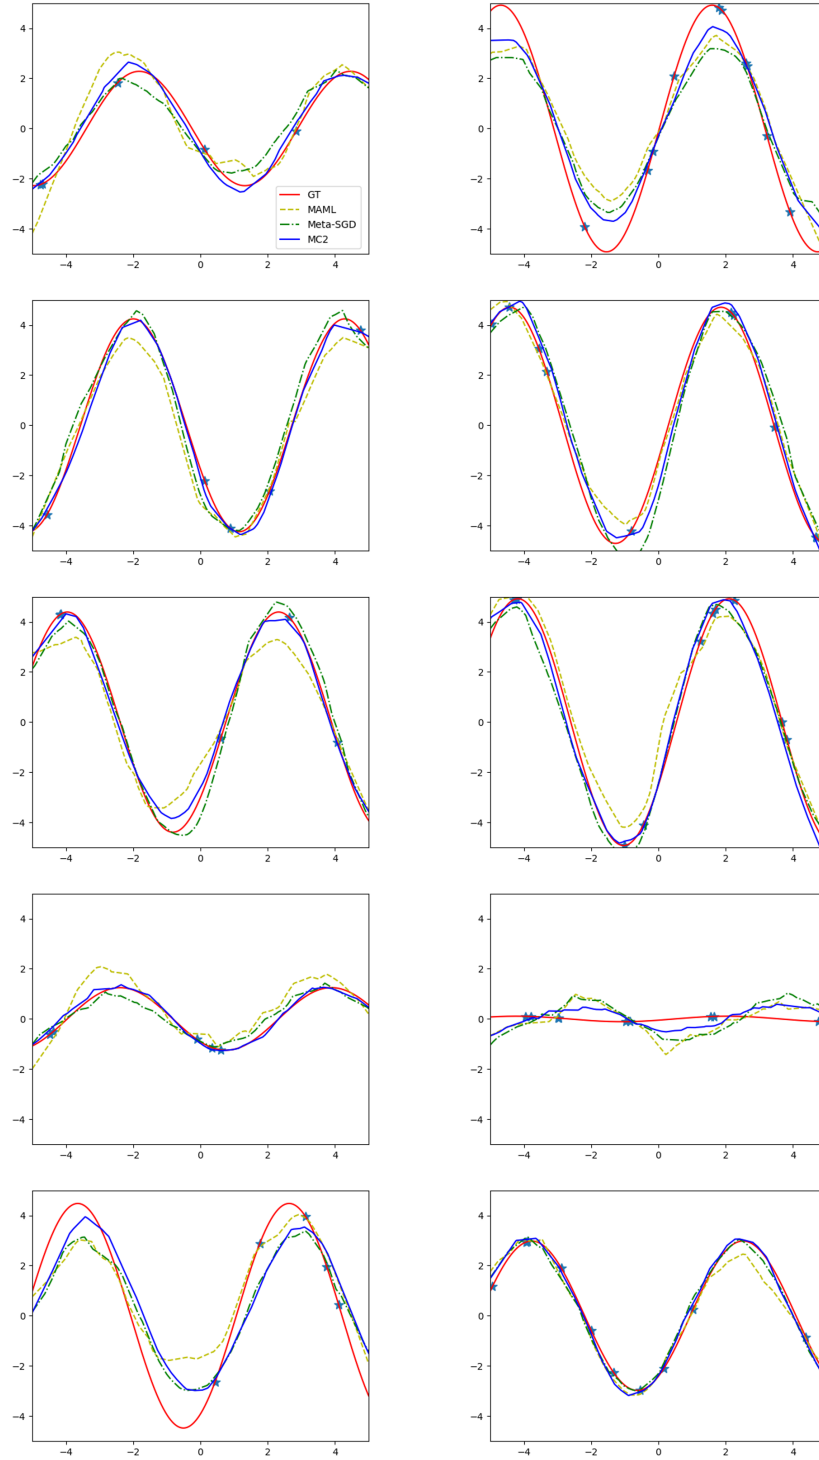

Figure 1: Qualitative results of few-shot regression on sinusoidal functions. The left column - 5 shot, The right column - 10 shot

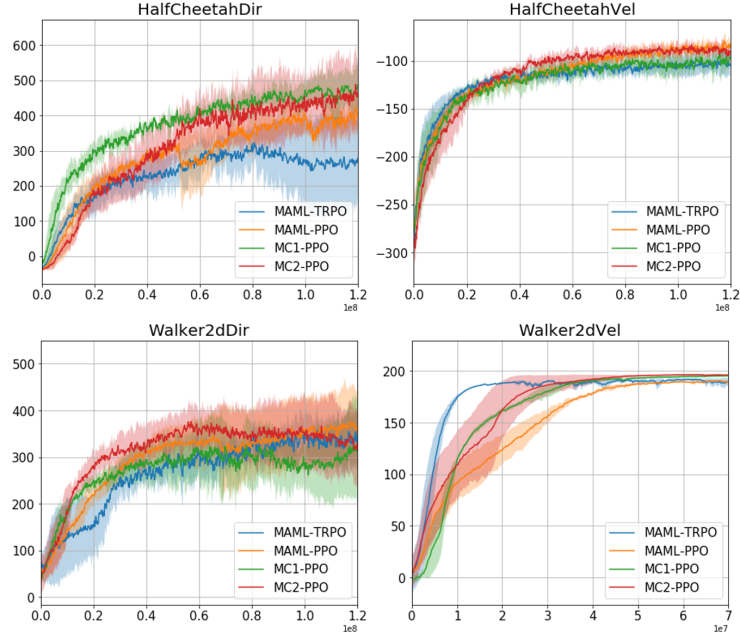

Figure 2: Reinforcement learning experimental results. Y-axis: rewards after the model updates. X-axis: meta-training steps. We performed at least three runs with random seeds and the curves are averaged over them.

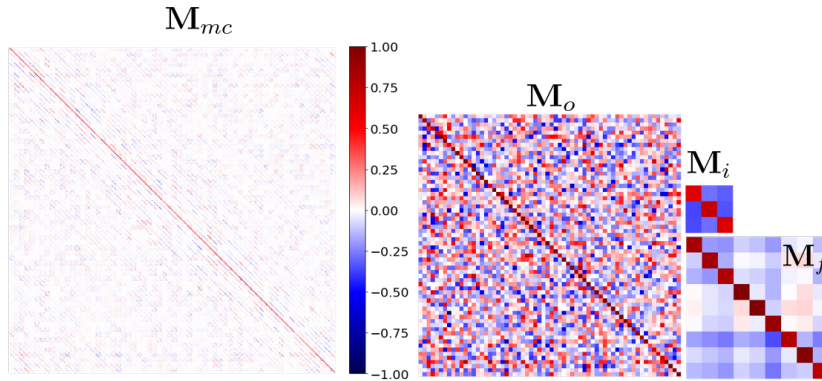

Figure 3: Visualization of meta-curvature matrices. We clipped the values  $[-1, 1]$  for better visualization (Best viewed in color)
